# Supplementary material for: Culture and National Well-Being: Should Societies Emphasize Freedom or Constraint?
Source: PLoS One. 2015 Jun 5;10(6):e0127173. doi: 10.1371/journal.pone.0127173 (PMC4457878; doi:10.1371/journal.pone.0127173)
Supplement: S1 Data File — (XLSX) [file pone.0127173.s002.xlsx]

## Sheet: Recovered_Sheet1
Country	Country_ISO_Code	Tightness	Tightness_Squared	Happiness_Index	Dysthymia_Prevalence	Suicide_Total	Life_Expectancy	Cardio_Diabetes_Death_Rate_Men	Cardio_Diabetes_Death_Rate_Women	GDP_per_capita	Political_Instability	Composite_Score	GINI_Coefficient	Individualism		Data File Legend
Australia	AUS	4.4	19.36	183.6	1.51	17.9	81.98	136	89	43000	3.6	62.4867	30.3	90		Variable Name	Variable Explanation
Austria	AUT	6.8	46.24	180.8	1.51	20.9	80.04	188	124	42600	3.6	58.2749	26.3	55		Country	Country Name
Belgium	BEL	5.6	31.36	184.7	1.51	24	79.78	161	102	37800	4	57.4131	28	75		Country_ISO_Code	Country Alpha-3 ISO Codes
Brazil	BRA	3.5	12.25	172.3	1.53	6.3	73.02	304	226	12100	5.4	43.7204	51.9	38		Tightness	Tightness Score; from Gelfand et al. (2011)
Estonia	EST	2.6	6.76	133	1.61	37.9	73.82	469	233	22400	6.7	22.7431	31.3	60		Tightness_Squared	Tightness Score, Squared
France	FRA	6.3	39.69	180.5	1.47	20	81.56	128	69	35700	5.3	58.9982	30.6	71		Happiness_Index	Happiness Index; World Values Survey & ASEP/JDS (Various years); http://www.jdsurvey.net/jds/jdsurveyActualidad.jsp?Idioma=I&SeccionTexto=0404&NOID=103
Germany	DEU	7	49	165.5	1.52	14.3	80.44	207	134	39500	3.8	56.1962	27	67		Dysthymia_Prevalence	Percentage of Dysthymia Incidence; Global Disease Burden, WHO Study (2010); http://www.plosmedicine.org/article/info%3Adoi%2F10.1371%2Fjournal.pmed.1001547#s4
Greece	GRC	3.9	15.21	149.7	1.51	4.2	80.18	215	158	23600	6.3	48.9851	34.3	35		Suicide_Total	Total Suicide Rate; from Krug et al. (2002)
Hong Kong	HKG	6.3	39.69	167.7		14.9	82.2			52700	4	62.3681	53.7	25		Life_Expectancy	Life Expectancy in years (2013); CIA World Factbook; https://www.cia.gov/library/publications/the-world-factbook/rankorder/2102rank.html
Hungary	HUN	2.9	8.41	150.2	1.62	36.1	75.24	416	241	19800	6.1	27.6997	24.7	80		Cardio_Diabetes_Death_Rate_Men	Mortality rate (per 100,000) from cardiovascular diseases and diabetes, men; WHO (2008); http://apps.who.int/gho/data/node.main.A865?lang=en
Iceland	ISL	6.4	40.96	194.3	1.5		81.11	156	86	40700	5.3	62.2947	28	60		Cardio_Diabetes_Death_Rate_Women	Mortality rate (per 100,000) from cardiovascular diseases and diabetes, women; WHO (2008); http://apps.who.int/gho/data/node.main.A865?lang=en
India	IND	11	121	151	1.56		67.48	386	283	4000	4.5	28.2696	36.8	48		GDP_per_capita	GDP per capita (2013); CIA World Factbook; https://www.cia.gov/library/publications/the-world-factbook/rankorder/2004rank.html
Israel	ISR	3.1	9.61	156.2	1.5	16.8	81.17	139	94	34900	5.5	53.5839	37.6	54		Political_Instability	Social Unrest/Political Instability Index; The Economist (2010); http://viewswire.eiu.com/site_info.asp?info_name=social_unrest_table&page=noads
Italy	ITA	6.8	46.24	179.4	1.46	8.4	81.95	156	102	29600	5	60.8499	31.9	76		Composite_Score	Composite Score of all 8 well-being variables
Japan	JPN	8.6	73.96	177.2	1.31	19.5	84.19	118	65	37100	3.8	68.7795	37.6	46		GINI_Coefficient	GINI Coefficient (various years); CIA World Factbook; https://www.cia.gov/library/publications/the-world-factbook/fields/2172.html
Malaysia	MYS	11.8	139.24	189.5	1.63		74.28	319	236	17500	6.5	37.6263	46.2	26		Individualism	Individualism; The Hofstede Center (no date) ; http://geert-hofstede.com/countries.html
Mexico	MEX	7.2	51.84	158.8	1.5	5.1	76.86	258	217	15600	6.1	45.4533	48.3	30
Netherlands	NLD	3.3	10.89	188	1.47	11	81.01	151	93	41400	4	64.6077	30.9	80
New Zealand	NZL	3.9	15.21	193.8	1.48	19.8	80.82	171	106	30400	3.6	60.8369	36.2	79
Norway	NOR	9.5	90.25	192.8	1.47	14.6	80.44	158	91	55400	1.2	71.2435	25	69
Pakistan	PAK	12.3	151.29	151.5	1.56		66.71	455	388	3100	7.8	16.4443	30.6	14
China	CHN	7.9	62.41	153.1	1.58	18.3	74.99	312	260	9800	4.8	36.4335	47.3	20
Poland	POL	6	36	179.3	1.62	17.9	76.45	366	205	21100	4.5	42.8338	34.1	60
Portugal	PRT	7.8	60.84	167.3	1.51	5.4	78.85	185	125	22900	4.8	54.5928	38.5	27
Singapore	SGP	10.4	108.16	189.8	1.41	15.7	84.07	171	109	62400	4.7	68.6674	46.3	20
South Korea	ROK	10	100	174.8	1.36	17.1	79.55	168	115	33200	5.1	59.6964	31.1	18
Spain	ESP	5.4	29.16	184.5	1.48	8.7	81.37	140	86	30100	5.5	60.4221	32	51
Turkey	TUR	9.2	84.64	172.4	1.47		73.03	403	322	15300	6.8	34.8968	40.2	37
Ukraine	UKR	1.6	2.56	152.1	1.61	33.8	68.93	772	441	7400	7.6	9.42917	28.2
United Kingdom	GBR	6.9	47.61	187	1.47	9.2	80.29	166	102	37300	4.6	62.3314	32.3	89
United States	USA	5.1	26.01	186.3	1.57	13.9	78.62	190	122	52800	5.3	56.8527	45	91
Venezuela	VEN	3.7	13.69	160.9	1.51	8.1	74.23	266	207	13600	7.3	40.7984	39	12
