# Supplementary material for: Culture and National Well-Being: Should Societies Emphasize Freedom or Constraint?
Source: PLoS One. 2015 Jun 5;10(6):e0127173. doi: 10.1371/journal.pone.0127173 (PMC4457878; doi:10.1371/journal.pone.0127173)
Supplement: S1 Table — (DOCX) [file pone.0127173.s003.docx]

**Table S1.** Correlations between Well-Being Index Variables

| Variables | 1 | 2 | 3 | 4 | 5 | 6 | 7 | 8 |
| --- | --- | --- | --- | --- | --- | --- | --- | --- |
| 1. Happiness | - |  |  |  |  |  |  |  |
| 2. Incidence of Dysthymia | -.42* | - |  |  |  |  |  |  |
| 3. Suicide Rate | -.33† | .38* | - |  |  |  |  |  |
| 4. Life Expectancy | .59** | -.63** | -.34† | - |  |  |  |  |
| 5. Cardiovascular Disease/Diabetes  Morality Rate, Men | -.62** | .65** | .57** | -.85** | - |  |  |  |
| 6. Cardiovascular Disease/Diabetes  Morality Rate, Women | -.63** | .60** | .40** | -.93** | .94** | - |  |  |
| 7. GDP per Capita | .63** | -.49** | -.08 | .83** | -.69** | -.80** | - |  |
| 8. Political Instability | -.56** | .39** | .14 | -.61** | .62** | .67** | -.66** | - |

* *p* < .01; ** *p* < .01; †*p* < .10
